# Supplementary material
Source: publisher site journal article supplement (https://www.dovepress.com/article/325203)

**Supplementary material**

Supplementary Figure S1. CBX7 was downregulated in various cancers. A. The oncomine database was used to explore CBX7 expression in cancer and normal tissues. Two-fold change, top 10% gene rank, and P value <.001 was set as the threshold. Red and blue indicates CBX7 upregulation and downregulation, respectively. B. GEPIA datasets were used to explore CBX7 expression in cancer and normal tissues. ACC, adrenocortical carcinoma; BLCA, bladder urothelial carcinoma; BRCA, breast invasive carcinoma; CESC, cervical squamous cell carcinoma and endocervical adenocarcinoma; COAD, colon adenocarcinoma; GBM, glioblastoma multiforme; KIRP, kidney renal papillary cell carcinoma, BGG, brain lower grade glioma; LUAD, lung adenocarcinoma; LUSC, lung squamous cell carcinoma; OV, ovarian serous cystadenocarcinoma; PRAD, prostate adenocarcinoma; REAS, rectum adenocarcinoma; SKCM,skin cutaneous melanoma; STAD, stomach adenocarcinoma; TGCT, testicular germ cell tumors; UCEC, uterine corpus endometrial carcinoma; UCS, uterine carcinosarcoma.


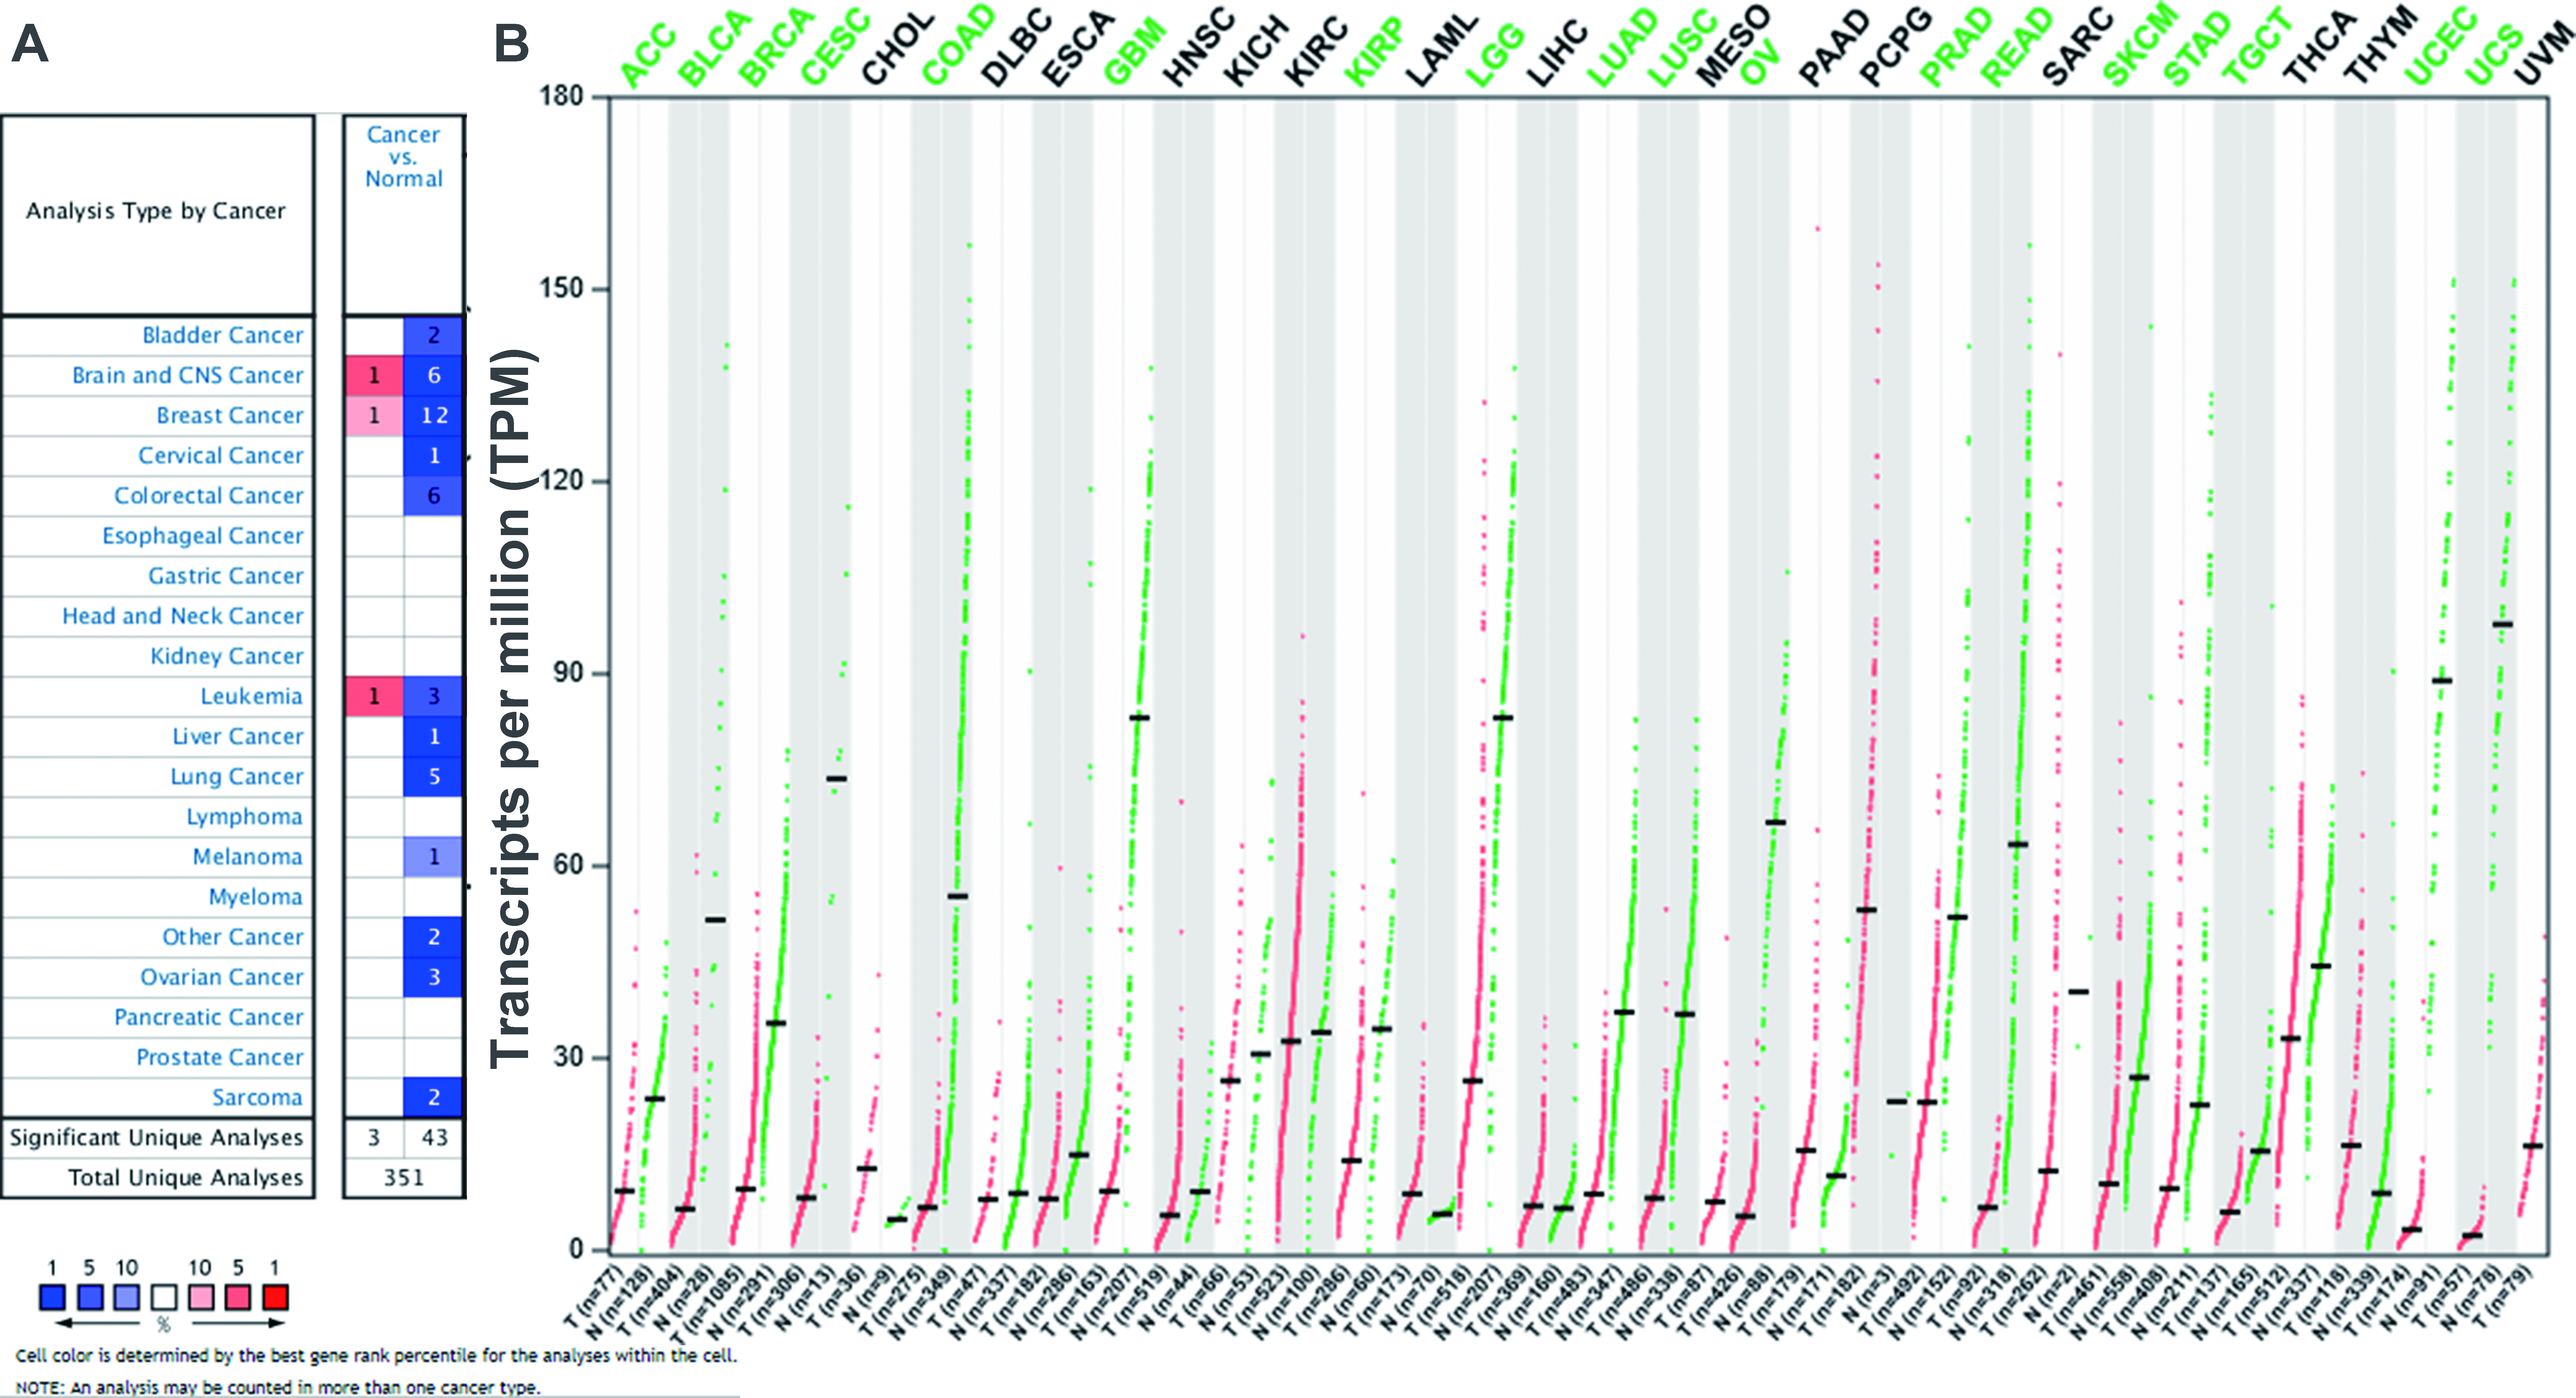

Supplement: Supplementary file 1 [file get_supplementary_file.php]
